# Supplementary material for: Campsites, forest fires, and entry point distance affect earthworm abundance in the Boundary Waters Canoe Area Wilderness
Source: PeerJ. 2020 Feb 25;8:e8656. doi: 10.7717/peerj.8656 (PMC7047863; doi:10.7717/peerj.8656)
Supplement: Supplemental Information 1 — Physical characteristics include island latitude & longitude, island area (m2), distance from entry point (m), island distance from lake shore, and whether island was burned and had campsites, island distance from lake shore (m). Also included are measured variables: earthworm density (#s/m2) and biomass (g/m2) and species richness; and data from sample sites: ground cover (%) understory vegetation cover (%) and soil organic matter (%). [file peerj-08-8656-s001.xlsx]

## Sheet: Density, Biomass, Richness
Island	Latitude	Longitude	Burned	Campsite	Island Size (m2)	Distance from Entry (m)	Distance from Shore (m)	Worm #s/m2	Worm biomass/ m2	Worm richness	Ground Cover (%)	Understory Veg. (%)	Soil Organic matter (%)
1	missing	missing	1	1	65807.3	9423	190.4	5	3.35245	4	95	45	5.94
2	N 47 53.009	W 091 26.517	1	0	12366	10764	15.5	9	0.4795	2	100	42	5.02
3	N 74 53.115	W 091 26.532	0	1	7255.67	10981	39.3	20	5.951	6	93	5	13.4
4	N 47 53.897	W 091 25.715	0	0	59567.3	10651	35.5	5	0.346	1	97	12	10.37
5	N 47 55.650	W 091 17.024	0	0	12666.3	25890	155	2	0.1315	1	100	50	11.92
6	N 47 55 646	W 091 16.803	0	1	9025.58	25717	117.8	8	10.485	3	93	78	11.07
7	N 47 51.928	W 091 17.114	0	1	12791.4	26316	168.9	7	5.503	2	100	77	8.01
8	N 47 59. 793	W 091 17.263	0	0	7060.87	26059	152.8	3	0.198	1	100	42	13.56
9	N 47 54.676	W 091 17.236	0	1	41688.1	24052	218.9	9	13.323	4	88	65	7.21
10	N 47 57.041	W 091 26.69	0	0	4004.36	7161	227.3	4	0.67	2	100	63	5.8
11	N 47 55.032	W 091 29.212	0	0	5179.51	4293	328.2	6	0.634	1	100	75	11.68
12	N 47 55.031	W 091 29.211	0	0	8347.82	4757	349.8	1	0.1155	1	100	45	9.43
13	N 47 54.904	W 091 29.621	0	0	21229.6	4412	266	3	0.1135	1	100	57	11.28
14	N 47 52.977	W 091 27.110	1	1	92450.8	10017	107.3	4	2.77595	3	85	45	6.95
15	N 47 53.036	W 091 26.944	1	0	118084	9549	277.5	4	0.336	2	70	28	6.84
16	N 47 53.806	W 091 26.597	0	1	26331.3	8834	13.5	18	3.8735	2	100	15	8.62
17	N 47 54.004	W 091 23.112	0	0	17369	14035	14.1	2	0.109	3	100	57	7.39
18	N 47 55.160	W 091 18.048	0	0	6789.94	25360	209.9	6	1.2955	2	100	20	13.03
19	N 47 54.787	W 091 17.773	0	0	4464.63	24579	211.9	0	0	0	100	13	9.47
20	N 47 54.710	W 091 17.635	1	0	11804.7	24319	97.9	3	0.8045	1	100	70	4.47
21	N 47 54. 617	W 091 17.409	1	0	5208.45	24043	143.1	2	0.3155	2	78	60	5.23
22	N 47 54.433	W 091 27.326	0	0	5960.48	6980	88.9	6	0.683	1	100	5	15.66
23	N 47 55.033	W 091 28.994	0	0	7163.49	4544	131.2	9	3.442	3	93	30	7.67
24	N 47 55.312	W 091 29.188	0	0	28941.6	3727	35.1	8	0.7615	1	100	33	9.23
25	N 47 55.199	W 091 29.713	0	0	21566.8	4490	110.9	7	0.5135	1	100	35	11.45
26	N 47 53.417	W 091 27.090	0	0	6507.86	9122	326.8	3	0.17745	2	100	8	15.59
27	N 47 53.702	W 091 26.555	1	0	7522.49	9004	192.1	8	3.4145	2	92	35	6.33
28	N 47 53.584	W 091 26.734	0	0	5310.24	8982	267.6	12	4.2075	4	100	3	10.97
29	N 47 53 725	W 091 20 846	1	1	13077.4	17374	36.6	3	4.216	2	93	62	7.4
30	N 47 54.556	W 091 16.853	0	1	22799.2	24023	127.3	7	9.3355	4	87	33	8.85
31	N 47 54.218	W 091 16.38	1	1	12149	23588	78.9	3	2.486	1	77	47	6.29
32	N 47 54.236	W 091 17.016	1	0	50234.5	23036	37.2	0	0	0	33	27	5.29
33	N 47 54.551	W 091 17.057	1	0	6355.65	24027	279.7	2	0.227	1	100	33	5.48
34	missing	missing	0	0	73079.7	24129	29	2	3.6225	2	98	17	12.06
35	N 47 54.328	W 091 27.790	1	1	14028.4	6681	22	5	4.0685	2	78	68	10.05
36	N 47 55.173	W 091 23.996	0	0	47150.6	4099	43.7	5	1.745	2	100	32	10.73
37	N 47 55.523	W 091 29.104	0	1	38524.2	3399	28	1	0.303	1	65	38	6.3
38	N 47 55.270	W 091 29.556	0	1	9351.68	4166	62.3	5	2.5305	1	75	65	9.98

## Sheet: Species
Island #	Burned	Campsite	Eisenia fetida	Dendrobaena octaedra	Dendrodrilus terrestris	Lumbricus rubellus	Allolobophora chlorotice	Aporrectodea rosea	Juvenile Aporrectodea	Octolasion tyrteum	Lumbricus terrestris	Juvenile Lumbricus
1	Not burned	Campsite	5	0	0	0	0	0	0	0	0	0
2	Not burned	No camp	0	45	0	0	0	0	0	0	0	0
3	Not burned	No camp	0	0	0	0	0	5	0	0	0	20
4	Not burned	Campsite	0	0	0	0	0	0	0	0	0	5
5	Not burned	No camp	0	30	0	0	0	0	0	0	0	0
6	Not burned	No camp	0	10	0	0	0	0	0	0	0	0
7	Not burned	No camp	0	30	0	0	0	0	0	0	0	0
8	Not burned	No camp	0	5	0	0	0	5	0	0	0	35
9	Not burned	No camp	0	5	0	0	0	0	0	0	0	0
10	Burned	Campsite	0	0	0	0	0	0	5	0	0	20
11	Not burned	No camp	0	30	0	0	0	0	0	0	0	0
12	Not burned	No camp	5	5	0	0	0	0	0	0	0	0
13	Not burned	Campsite	0	0	0	30	0	0	10	0	0	50
14	Not burned	No camp	0	0	0	15	0	0	5	0	0	35
15	Burned	No camp	0	0	0	0	0	0	0	0	5	20
16	Not burned	No camp	0	10	0	5	0	0	0	0	0	0
17	Burned	Campsite	10	5	0	0	0	0	0	5	5	0
18	Burned	No camp	0	0	0	10	0	0	0	0	0	10
19	Burned	Campsite	0	0	0	5	0	0	0	0	5	10
20	Not burned	No camp	0	25	0	0	0	0	0	0	0	0
21	Burned	No camp	0	0	0	10	0	0	0	0	0	35
22	Not burned	Campsite	40	5	0	0	5	0	5	10	0	10
23	Not burned	No camp	0	5	0	0	0	0	0	0	0	5
24	Burned	Campsite	0	0	0	0	0	0	0	0	5	10
25	Burned	No camp	0	0	0	0	0	0	0	0	0	0
26	Burned	Campsite	0	0	0	0	0	0	0	0	0	10
27	Not burned	Campsite	0	5	0	0	0	0	0	0	5	20
28	Burned	No camp	0	10	0	0	0	0	0	0	0	0
29	Burned	No camp	0	5	0	0	0	0	0	0	0	5
30	Not burned	Campsite	0	0	10	0	0	5	15	0	0	30
31	Not burned	No camp	0	15	0	0	0	0	0	0	0	10
32	Burned	No camp	0	0	0	0	0	0	0	0	0	15
33	Not burned	No camp	0	0	0	0	0	0	0	0	0	0
34	Not burned	No camp	0	20	0	0	0	0	0	0	0	10
35	Burned	Campsite	0	0	0	0	0	0	5	0	5	30
36	Not burned	No camp	0	0	0	0	0	10	0	0	0	0
37	Not burned	No camp	0	0	0	0	0	0	0	0	0	15
38	Not burned	Campsite	0	0	0	20	0	0	0	0	5	0
